1  
2  
3  
4  
5  
6  
7  
8  
9  
10  
11  
12  
13  
14  
15  
16  
17  
18

**Depside and depsidone synthesis in lichenized fungi comes into focus through a genome-wide comparison of the olivetoric and physodic acid chemotype of *Pseudevernia furfuracea***

Garima Singh<sup>†,‡,\*</sup>, Daniele Armaleo<sup>§</sup>, Francesco Dal Grande<sup>†,‡</sup>, Imke Schmitt<sup>†,‡,^</sup>

<sup>†</sup> Senckenberg Biodiversity and Climate Research Centre (SBIK-F), 60325 Frankfurt am Main, Germany

<sup>‡</sup> LOEWE Center for Translational Biodiversity Genomics (TBG), 60325 Frankfurt am Main, Germany

<sup>§</sup> Department of Biology, Duke University, Durham, N.C. 27708, U.S.A.

<sup>^</sup> Molekulare Biotechnologie, Fachbereich Biowissenschaften, Goethe Universität Frankfurt, 60438 Frankfurt am Main, Germany

Corresponding author:

Garima Singh: [garima.singh@senckenberg.de](mailto:garima.singh@senckenberg.de)

19 **ABSTRACT**

20 Primary biosynthetic enzymes involved in the synthesis of lichen polyphenolic compounds  
21 depsides and depsidones are Non-Reducing Polyketide Synthases (NR-PKSs), and  
22 cytochrome P450s (CytP450). However, for most depsides and depsidones the corresponding  
23 PKSs are unknown. Additionally, in non-lichenized fungi specific fatty acyl synthases (FASs)  
24 provide starters to the PKSs. Yet, the presence of such FASs in lichenized fungi remains to be  
25 investigated. Here we implement comparative genomics and metatranscriptomics to identify  
26 the most likely PKS and FASs for the synthesis of olivetoric and physodic acid, the primary  
27 depside and depsidone defining the two chemotypes of the lichen *Pseudevernia furfuracea*.  
28 We propose that the gene cluster PF33-1\_006185, found in both chemotypes, is the most  
29 likely candidate for olivetoric and physodic acid biosynthesis. This is the first study to  
30 identify the gene cluster and the FAS likely responsible for physodic and olivetoric acid  
31 biosynthesis in a lichenized fungus. Our findings suggest that gene regulation and other  
32 epigenetic factors determine whether the mycobiont produces the depside or the depsidone,  
33 providing the first direct indication that chemotype diversity in lichens can arise through  
34 regulatory and not only through genetic diversity. Combining these results and existing  
35 literature, we propose a detailed scheme for depside/depsidone synthesis.

36

37

38 **Key words**

39 Lichen-forming fungi, natural products, secondary metabolites, orsellinic acid derivatives,  
40 chemosyndrome, biosynthetic gene clusters, fatty acyl synthases, cytochrome P450, PKSs

41

42 **Introduction**

43

44 Depside and depsidones, the polyphenolic polyketides mostly synthesized by lichenized  
45 fungi, are of significant pharmaceutical interest (Shukla *et al.*, 2010; Shrestha and St. Clair,  
46 2013; Ingelfinger *et al.*, 2020). Depsides consist of two or sometimes three orcinol or  $\beta$ -  
47 orcinol-derived aromatic rings joined by ester linkages; depsidones have an additional ether  
48 linkage between the rings (Fig. 1). Additionally, depending on the starters used by the  
49 polyketide synthases (PKSs) assembling their backbones, 3-7 carbon side chains may be  
50 linked to the 6 and 6' carbons of the orcinol-derived rings. Together with other ring  
51 modifications, side chains constitute the distinguishing features of different depsides and  
52 depsidones. Although chemical proposals for deposite and depsidone biosynthesis go back  
53 many decades (Seshadri, 1944; Elix *et al.*, 1987), the precise enzymatic steps of deposite and  
54 depsidone synthesis still need to be elucidated. Furthermore, for most of the deposite and  
55 depsidone metabolites of lichens the corresponding genes remain uncharacterized. This is  
56 because fungi contain far more biosynthetic genes than known compounds (Meiser *et al.*,  
57 2017; Calchera *et al.*, 2019). One way to connect metabolites to the associated genes is to  
58 identify all the genomic regions with putative biosynthetic genes, and narrow down this  
59 selection to the most likely gene cluster based on phylogenetic evidence, and other cluster  
60 information, such as presence of particular genes. Long reads sequencing technologies  
61 providing high quality contiguous genome assemblies have greatly facilitated this process.

62

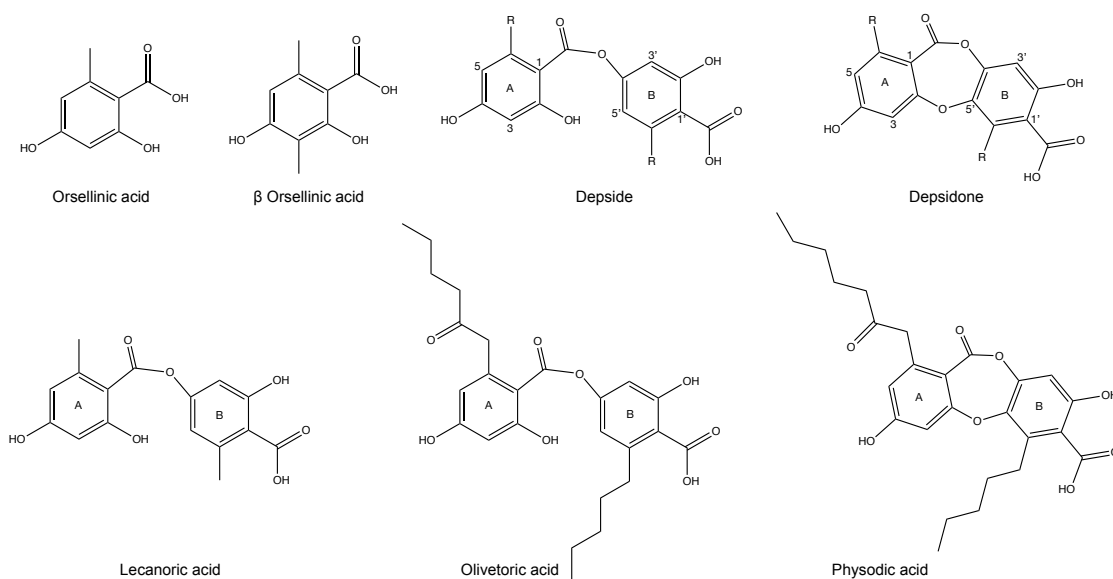

63  
64 **Figure 1.** Chemical structure of orsellinic acid and methyl-3-orsellinate (the monocyclic  
65 precursors of depsides and depsidones), lecanoric acid, a depside, a depsidone, olivetoric acid,  
66 and physodic acid. The letters and ring numberings used for the generic depside are the same  
67 for all depsides and depsidones.

68  
69 Fungal type I PKSs are iterative, and consist of several domains with defined  
70 functions. Non-reducing, type I PKSs (NR-PKSs) contain KS (keto-synthase), AT  
71 (acyltransferase), PT (product template), ACP (acyl carrier protein), and TE (thioesterase)  
72 domains (Kroken *et al.*, 2003; Cox and Simpson, 2009). While NR-PKSs have long been  
73 known to assemble and fold the carbon backbones of depsides and depsidones, their specific  
74 roles in linking the rings have come to light only recently. A single PKS catalyzes the  
75 formation and dimerization of phenolic rings to produce a depside (Armaleo *et al.*, 2011;  
76 Kealey *et al.* 2021) while a cytochrome P450 is needed to catalyze the formation of an ether  
77 bond between the depside rings to produce a depsidone (Armaleo *et al.*, 2011). The PKS  
78 constructs and esterifies the two different rings using two ACP domains (Feng *et al.*, 2019).  
79 The genes for PKS and cytochrome P450 (CytP450) are closely linked within the same  
80 biosynthetic gene cluster (BGC). BCGs contain several genes involved in the synthesis of a  
81 compound, e.g., the core biosynthetic PKS, redox enzymes, transporters, etc. A BGC is  
82 named based on the type of backbone enzyme encoded by the core gene, e.g., a PKS cluster, a  
83 terpene cluster, etc.

84                    Apart from the above-stated genes, studies with non-lichen-forming fungi indicate  
85 that specific fatty acyl synthases (metabolite FASs) play significant roles in metabolite  
86 synthesis by providing the appropriate acyl chain starters to some PKSs (Hitchman *et al.*,  
87 2001; Watanabe and Townsend, 2002; Smith and Tsai, 2007). Inactivation of metabolite  
88 FASs may inhibit secondary metabolite synthesis even when the corresponding PKS and  
89 BGC remain functional (Brown *et al.*, 1996). However, the role of metabolite FAS in  
90 providing the starters for depsides and depsidones in lichen-forming fungi has not been  
91 investigated, despite the fact that the primary starters of orcinol depsides and depsidones are,  
92 besides the C2 doublet from AcetylCoA, C4, C6, and C8 acyl chains (Culberson and  
93 Culberson, 1976). After polyketide assembly and cyclization, the resulting ring sidechains  
94 will respectively be 1, 3, 5, 7 carbons long. Recently and coincidentally, the NR-PKS from  
95 the lichen *Pseudevernia furfuracea* that we identify in this work as the likely producer of the  
96 depside olivetoric acid was reported to produce the depside lecanoric acid when  
97 heterologously expressed in yeast (Kealey *et al.*, 2021). Yet in nature lecanoric acid has never  
98 been reported from *P. furfuracea*. The difference between lecanoric and olivetoric acid is that  
99 the former has a methyl group on each ring whereas the latter has as a C5 side chain on one  
100 ring and a C7 side chain on the other (Fig. 1). We integrate this apparent discrepancy with  
101 other data to highlight the central role that lichen short chain FASs are likely to play in  
102 providing the side chains common in orcinol depsides and depsidones.

103                    In this study we implemented a long-read-based genomic approach to better  
104 understand the mechanism of depside/depsidone synthesis in lichen-forming fungi. We chose  
105 *Pseudevernia furfuracea* as our study system, because it is a textbook example of  
106 chemosyndrome variation in a lichen-forming fungus (Culberson *et al.*, 1977; Halvorsen and  
107 Bendiksen, 1982; Kosanić *et al.*, 2013). This lichen consists of two naturally occurring  
108 chemotypes, one synthesizing an orcinol depside (olivetoric acid), and the other the  
109 corresponding depsidone (physodic acid), and thus constitutes an ideal model to study  
110 depside/depsidone synthesis, and the causes of chemotype diversity. Both chemotypes also  
111 synthesize the  $\beta$ -orcinol depside atranorin, common in many lichens. Specifically, we aim to  
112 answer the following questions: 1) Do the depside and the depsidone producer contain the  
113 same number of BGCs? 2) Which BGC/s are likely responsible for the production of depside  
114 olivetoric acid and the depsidone physodic acid in *P. furfuracea* chemotypes? 3) Are there  
115 homologs of metabolite FASs in the lichen-forming fungal genome? 4) Can we integrate the  
116 available data to provide a detailed scheme of orcinol depside/depsidone biosynthesis in  
117 lichens?

## 118 **Materials and methods**

### 119 **Identification of chemotypes**

120 We used high performance liquid chromatography (HPLC) to investigate the chemotype of *P.*  
121 *furfuracea*. For this, we collected several samples of *P. furfuracea* and performed HPLC  
122 analysis using the protocol from Feige et al. and Benatti et al. (2013). Firstly, small thallus  
123 pieces were extracted for 1 hour at room temperature in 200  $\mu$ l of methanol. From this, 150  $\mu$ l  
124 of the extract of each sample was centrifuged 1 min at 800 rpm through a Pall Acroprep  
125 Advance 0.2  $\mu$ m polytetrafluoroethylene filter plate and then diluted 10-fold with methanol.  
126 The samples were analyzed on an Agilent 1260 quaternary system with a quaternary pump, an  
127 incorporated degasser and using an Agilent Poroshell 120 EC-C18 column (2.7  $\mu$ m, 3.0 x 50  
128 mm). Substances were separated at 30°C using two solvent systems and a flow rate of 1.4  
129 ml/min. Solvent A is Aqua Bidest, 30% methanol and 0.0658% trifluoroacetic acid, and  
130 solvent B is 100% methanol. The HPLC system was equilibrated to solvent A for 2 min and  
131 2  $\mu$ l of extract was injected automatically after a needle wash. The runs continued isocratically  
132 for 0.18 min, solvent B was increased to 58% within 5 min, then increased to 100% within the  
133 next 5 min and isocratically maintained for 0.82 min. The runs ended with solvent A being  
134 increased back to 100% within 0.5 min. After the run the column was flushed for two minutes  
135 before the next run. Compounds were detected with a diode array detector (DAD) at 210, 254,  
136 280 and 310 nm. The retention times and spectra ( $\lambda$  = 190-650 nm with 2 nm steps) were  
137 compared against a library of authentic products derived under identical conditions using the  
138 Agilent OpenLAB CDS ChemStation software. We then selected one sample of each  
139 chemotype for genome sequencing (Supplementary Table S1).

140

### 141 **DNA extraction and genome sequencing**

142 Lichen thalli were thoroughly washed with sterile water, and checked under the  
143 stereomicroscope for the presence of possible contamination. DNA was extracted from both  
144 samples using a CTAB-based method (Cubero and Crespo, 2002). DNA concentration was  
145 measured with a Qubit fluorometer (dsDNA BR, Invitrogen). 4.1  $\mu$ g and 7.4  $\mu$ g DNA for the  
146 physodic- and olivetoric acid chemotype, respectively, were sent to Novogene Hong Kong for  
147 PacBio library preparation and sequencing on two separate SMRT cells, one for each  
148 chemotype.

149

## 150 **Genome assembly and annotation**

151 PacBio metagenomes were assembled using the long-read based assembler metaFlye v2.3.1  
152 (Kolmogorov *et al.*, 2019). Reads were filtered for length (>2000 kb fragments only) and  
153 assembly was optimized for minimal read overlap of 3 kb, and an estimated combined  
154 metagenome size of 120 Mb. The assembled genome was polished twice using the software  
155 Arrow from the SMRTlink suite v. 5.0.1.9585 (Walker *et al.*, 2014). The resulting contigs  
156 were then scaffolded with SSPACE-LongRead v1.1 (Boetzer and Pirovano, 2014).  
157 Ascomycota contigs were then identified in the metagenomic assembly using Diamond  
158 v0.8.34.96 BLASTx using the more-sensitive mode for longer sequences and a default e-value  
159 cut-off of 0.001 against the custom database. The Diamond results were then parsed in  
160 MEGAN68 v.6.7.7 using max expected set to 1E-10 and the weighted lowest common  
161 ancestor (LCA) algorithm. All contigs assigned to Ascomycota were exported to represent the  
162 *P. furfuracea* mycobiont. Assembly indicators such as number of contigs, total length and  
163 N50 were accessed with Assemblathon v2 (Table 1). Genome completeness was estimated  
164 based on evolutionarily-informed expectations of gene content with BUSCO v.4.0  
165 (Benchmarking Universal Single-Copy Orthologs) (Simão *et al.*, 2015). The genomes are  
166 deposited in GenBank under accessions xx and xx.

167

## 168 **Identification and Annotations of Biosynthetic Gene Clusters**

169 Gene prediction, functional annotation and prediction of BGCs in both *P. furfuracea*  
170 chemotype assemblies were performed with scripts based on the funannotate pipeline  
171 (Palmer and Stajich, 2019) and antiSMASH (antibiotics & SM Analysis Shell, v5.0)  
172 (Medema *et al.*, 2011; Blin *et al.*, 2019). First, the repetitive elements were masked in the  
173 assembled genomes (using funannotate), followed by gene prediction using BUSCO2 to train  
174 Augustus and self-training GeneMark-ES. Functional annotation was then automatically  
175 carried out with InterProScan, EggNOG-mapper and BUSCO ascomycota\_odb10 models.  
176 Secreted proteins were predicted using SignalP as implemented in funannotate 'annotate'  
177 command. The interproscan, antismash and phobius results were automatically generated.

178

## 179 **Identification of homologous BGCs**

180 Homologous clusters between the two *P. furfuracea* chemotypes were identified by  
181 performing reciprocal blast between the core genes of the BGCs of both genomes. For this,  
182 first the core genes from the predicted BGCs of one chemotype were used as database and the  
183 core genes of the BGCs from the other chemotype as query. The process was then repeated



184 using the other chemotype as database. The homology between the clusters was then  
185 confirmed based on sequence similarity and the most similar hit of the core gene in the  
186 MIBiG v2 (Minimum Information about a Biosynthetic Gene cluster; (Kautsar *et al.*, 2020))  
187 database (Supplementary table S2).

188 Homologous clusters were visualized using synteny plots as implemented in  
189 Easyfig v2.2.3 (Sullivan *et al.*, 2011). The GBK input files for Easyfig were generated with  
190 seqkit v0.10.1 (Shen *et al.*, 2016) and the seqret tool from EMBOSS v6.6.0.0 (Rice *et al.*,  
191 2000). Easyfig was run with tblastx v2.6.0+, a minimum identity value of 90 and a minimum  
192 length of 50 to draw the blast hits (Kjærboelling *et al.*, 2018). Clusters were manually matched  
193 for orientation so that the core gene were oriented in the same direction. For six BGCs, no  
194 corresponding cluster was detected in the other chemotype (Table 2, Supplementary Table  
195 S2).

196

### 197 **Phylogenetic analyses**

198 NR-PKSs have been divided into nine groups based on protein sequence similarity and PKS  
199 domain architecture (Ahuja *et al.*, 2012; Liu *et al.*, 2015; Kim *et al.*, 2021). We took  
200 representative PKSs from each group (amino acid sequences) and added the amino acid  
201 sequences of the eight *NR-PKSs* from *P. furfuracea*. The dataset includes 107 PKS sequences  
202 from *Cladonia borealis*, *C. grayi*, *C. macilenta*, *C. metacorallifera*, *C. rangiferina*, *C.*  
203 *uncialis*, *Pseudevernia furfuracea* and *Stereocaulon alpinum*. Sequences were aligned using  
204 MAFFT as implemented in Geneious v5.4. Gaps were treated as missing data. The maximum  
205 likelihood search was performed on the aligned amino acid sequences with RAxML-HPC  
206 BlackBox v8.1.11 (Stamatakis, 2006, 2014) on the Cipres Scientific gateway (Miller *et al.*,  
207 2010).

208

### 209 **Candidate cluster for physodic- and olivetoric acid synthesis**

210 In addition to the phylogenetic evidence, we implemented several criteria to select the  
211 candidate cluster for depside/depsidone synthesis in *P. furfuracea*: 1) it must be present in  
212 both chemotypes, (presence in both chemotypes is expected as the basic structure of physodic  
213 and olivetoric acid is same except that physodic acid contains an additional ether bond (Fig.  
214 1)) 2) it must contain a *NR-PKS* (the non-reduced backbone of lichen depsides/depsidones  
215 suggests that the *PKSs* involved in their synthesis are *NR-PKSs*), and 3) the *NR-PKS* must  
216 contain two ACPs (the presence of two ACPs has been associated with depside production in  
217 fungi (Feng *et al.*, 2019; Lünne *et al.*, 2020), and is a typical feature of lichen-forming fungal



218 *NR-PKSs* involved in depside/depsidone synthesis (Armaleo *et al.*, 2011; Pizarro *et al.*,  
219 2020)). Additionally, in the physodic acid producer the candidate BGC must contain a  
220 *CytP450* which produces depsidones by forming the ether bond between the two orsellinic  
221 rings of the depside (Armaleo *et al.*, 2011).

222 Summarizing, the following criteria were used for the identification of olivetoric-  
223 /physodic acid BGC: 1) the candidate BGC should be homologous and present in both  
224 chemotypes, 2) presence of a *CytP450*, and 3) presence of two ACP domains in the *PKS* as  
225 the ring dimerization of orsellinic acid precursors into a depside involves two ACP domains  
226 (Feng *et al.*, 2019; Lünne *et al.*, 2020).

227

### 228 **Identification of HexA and HexB**

229 Metabolite FASs consist of a HexA/HexB multienzyme complex (Brown *et al.*, 1996;  
230 Hitchman *et al.*, 2001). Homologous of *HexA* and *HexB* were identified by blasting (blastN)  
231 the *HexA* and *HexB* homologs of *Cladonia grayi* (CLAGR\_008938-RA and  
232 CLAGR\_008939-RA, available at [https://mycocosm.jgi.doe.gov/cgi-](https://mycocosm.jgi.doe.gov/cgi-bin/browserLoad/?db=Clagr3&position=scaffold_00085:34887-93856)  
233 [bin/browserLoad/?db=Clagr3&position=scaffold\\_00085:34887-93856](https://mycocosm.jgi.doe.gov/cgi-bin/browserLoad/?db=Clagr3&position=scaffold_00085:34887-93856)) against the genomes  
234 of both chemotypes.

235

### 236 **Metatranscriptome analyses and quantification of *PKS*, *CytP450* and *HexA* and *HexB*** 237 **transcripts**

238 The details of RNA isolation and transcriptome extraction are given in Meiser *et al.* (2017).  
239 Briefly, for RNA isolation, whole lichen thalli were collected and stored directly in RNAlater  
240 (Sigma-Aldrich Chemie GmbH, Munich, Germany). RNA was isolated from both chemotypes  
241 of *P. furfuracea* by using the method described by Rubio-Piña & Zapata-Pérez (2011) after  
242 blotting the thalli dry and grinding them in liquid nitrogen with a mortar and pestle. The  
243 isolated poly-A<sup>+</sup> RNA was further purified with the RNeasy MinElute Clean-up Kit (Qiagen,  
244 Hilden, Germany), and sequenced (250 bp paired-end reads) on Illumina MiSeq at StarSeq  
245 (Mainz, Germany).

246 The BGC for depside/depsidone biosynthesis in each chemotype contains 10  
247 genes including one *Pfur33-1\_006185*, one *CytP450*, and a monooxygenase (see below). The  
248 other seven code for unidentified proteins. We used transcriptome data to check which genes  
249 in this cluster are transcriptionally active. For this, we first indexed the sequence of interest  
250 using bowtie and then aligned it to the transcripts (both paired and unpaired reads) using

251 tophat v2 (Kim *et al.*, 2013). To make the counts comparable between chemotypes we used  
 252 RPKM normalization of the read counts(Mortazavi *et al.*, 2008), accounting for sequencing  
 253 depth and gene length (Oshlack and Wakefield, 2009; Robinson and Oshlack, 2010; Dillies *et*  
 254 *al.*, 2013). The normalization for sequencing depth was performed by dividing the counts by  
 255 the raw read count of the given gene with the total number of reads in each sample. The  
 256 resulting number was then divided by gene length in kilobases to obtain RPKM normalized  
 257 counts.

258

## 259 Results

260

### 261 Genomes of the *P. furfuracea* chemotypes

262 The number of reads for each sample retained after quality and length filtering is given in  
 263 Table 1. The reference genome of the PacBio-based *P. furfuracea* physodic acid chemotype  
 264 (NCBI acc. no. XXX) is ~34 Mb in length and has a completeness of 96% according to  
 265 BUSCO (details in Table 1). The genome of the olivetoric acid chemotype (NCBI acc. no.  
 266 XXX) is ~37 Mb in length and has a completeness of 92% according to BUSCO (details in  
 267 Table 1).

268

**Table 1.** Genome statistics and GB accession numbers of the two chemotypes of *P. furfuracea*

|                          |                             | Physodic acid chemotype | Olivetoric acid chemotype |
|--------------------------|-----------------------------|-------------------------|---------------------------|
| <b>Sequencing report</b> | data repository             | XXX                     | XXX                       |
|                          | Subreads bases(G)           | 8.182                   | 8.122                     |
|                          | Average subreads length     | 9563                    | 9325                      |
|                          | N50 raw reads               | 12855                   | 12479                     |
| <b>Assembly stats</b>    | # scaffolds                 | 104                     | 53                        |
|                          | cds                         | 11199                   | 10480                     |
|                          | size (Mb)                   | 34.2                    | 37.3                      |
|                          | N50                         | 632kb                   | 1.6 Mb                    |
|                          | % completeness              | 96                      | 92                        |
|                          | homologous clusters         |                         | 51                        |
|                          | chemotype specific clusters | 5                       | 1                         |
| <b>BGCs summary</b>      | R-PKSs                      | 19                      | 14                        |
|                          | NR-PKSs                     | 4                       | 4                         |
|                          | hybrid                      | 10                      | 8                         |
|                          | T3-PKS                      | 1                       | 1                         |
|                          | NRPS                        | 4                       | 4                         |
|                          | NRPS-like                   | 10                      | <u>12</u>                 |

|          |   |               |
|----------|---|---------------|
| Terpenes | 6 | $\frac{6}{2}$ |
| indole   | 2 | $\frac{2}{2}$ |

269

270 **Table 1.** Genome statistics and GB accession numbers of the two chemotypes of *P.*

271 *furfuracea*. Biosynthetic gene clusters (BGCs) predicted by antiSMASH are also given.

272 PKS=polyketide synthase, R-PKS=reducing PKS, NR-PKS=non-reducing PKS T3 PKS=xx,

273 hybrid=xx, NRPS=non-ribosomal peptide synthetase.

274

### 275 **Predicted BGCs**

276 A total of 51 homologous BGCs were present in both chemotypes: 14 clusters with reducing

277 *PKSs* (*R-PKS*), eight clusters with *NR-PKSs*, one cluster with type III *PKS*, seven hybrid

278 clusters, 14 clusters with *NRPS* or *NRPS*-like genes, five clusters with terpene synthase, and

279 two clusters with indole synthase as a core gene (Supplementary Table S2). Six BGCs, were

280 found only in one of the two chemotypes (Table 2). Five BGCs were only present in the

281 physodic acid chemotype (four BGCs with a *R-PKS*, a hybrid cluster with a *R-PKS* and a

282 *NRPS*, and a cluster with terpene synthase as the core gene), and one BGC with terpene

283 synthase as the core gene was present only in the olivetoric acid chemotype (Table 2).

284

**Table 2.** Number of raw DNA reads (nucleotides) normalized by number of reads and gene length aligned to the core genes of the clusters detected in only one chemotype

| Clusters detected in only one chemotype |                     |                           |           |                                                  |                                                    |
|-----------------------------------------|---------------------|---------------------------|-----------|--------------------------------------------------|----------------------------------------------------|
| cluster number                          | name of the cluster | detected in               | core gene | normalized read count in physodic acid chemotype | normalized read count in olivetoric acid chemotype |
| 52                                      | Region 7.2          | Physodic acid chemotype   | R-PKS     | 24.66                                            | 0                                                  |
| 53                                      | Region 25.1         | Physodic acid chemotype   | R-PKS     | 11.50                                            | 0                                                  |
| 54                                      | Region 60.2         | Physodic acid chemotype   | hybrid    | 24.44                                            | 0                                                  |
| 55                                      | Region 65.1         | Physodic acid chemotype   | R-PKS     | 18.30                                            | 0                                                  |
| 56                                      | Region 27.1         | Physodic acid chemotype   | terpene   | 59.99                                            | 0                                                  |
| 57                                      | Region 10.1         | olivetoric acid chemotype | terpene   | 0                                                | 133.94                                             |
| Clusters present in both chemotypes     |                     |                           |           |                                                  |                                                    |
| 1                                       | Region 12.3         | both chemotypes           | NR-PKS    | 18.19                                            | 47.66                                              |
| 2                                       | Region 18.1         | both chemotypes           | NR-PKS    | 16.43                                            | 56.19                                              |
| 3                                       | Region 44.1         | both chemotypes           | NR-PKS    | 29.05                                            | 43.41                                              |
| 4                                       | Region 33.1         | both chemotypes           | NR-PKS    | 37.08                                            | 42.14                                              |
| 9                                       | Region 10.1         | both chemotypes           | R-PKS     | 20.14                                            | 45.88                                              |
| 11                                      | Region 16-1         | both chemotypes           | R-PKS     | 25.53                                            | 48.84                                              |
| 12                                      | Region 2.4          | both chemotypes           | R-PKS     | 33.33                                            | 42.85                                              |
| 15                                      | Region 9.2          | both chemotypes           | R-PKS     | 35.00                                            | 39.86                                              |
| 6                                       | Region 9.3          | both chemotypes           | R-PKS     | 23.87                                            | 41.47                                              |
| 5                                       | Region 2.2          | both chemotypes           | R-PKS     | 26.24                                            | 53.15                                              |

|    |             |                 |         |       |        |
|----|-------------|-----------------|---------|-------|--------|
| 44 | Region 38.1 | both chemotypes | terpene | 40.34 | 107.15 |
| 45 | Region 33.2 | both chemotypes | terpene | 83.56 | 119.52 |
| 46 | Region 2.3  | both chemotypes | terpene | 37.49 | 114.33 |
| 47 | Region 12.2 | both chemotypes | terpene | 50.63 | 149.93 |
| 48 | Region 60.1 | both chemotypes | terpene | 51.24 | 85.36  |

---

285

286 **Table 2.** Properties of the clusters detected in only one chemotype including the core gene  
287 and its length, number of raw reads (nucleotide) normalized read counts (by number of reads  
288 and gene length (RPKM approach)) aligned to the core genes of the clusters detected in only  
289 one chemotype.

290

### 291 **Phylogenetic analyses**

292 Out of eight *NR-PKSs*, only two, *Pfur33-1\_006185* and *Pfur2-2\_003072*, grouped into  
293 phylogenetic group I, whose *PKSs* are involved in the synthesis of orcinol derivatives (Fig. 2),  
294 like grayanic, olivetoric and physodic acid. Of these *PKSs*, *Pfur33-1\_006185* was closely  
295 related to *PKS16*, the *PKS* associated with grayanic acid biosynthesis from *Cladonia grayi*,  
296 whereas *Pfur2-2\_003072* was closely related to *PKS27*. The *Pfur33-1\_006185* cluster also  
297 contains a *CytP450* next to the *NR-PKS* in an arrangement analogous to that in the *PKS16*  
298 cluster in *C. grayi*.

299

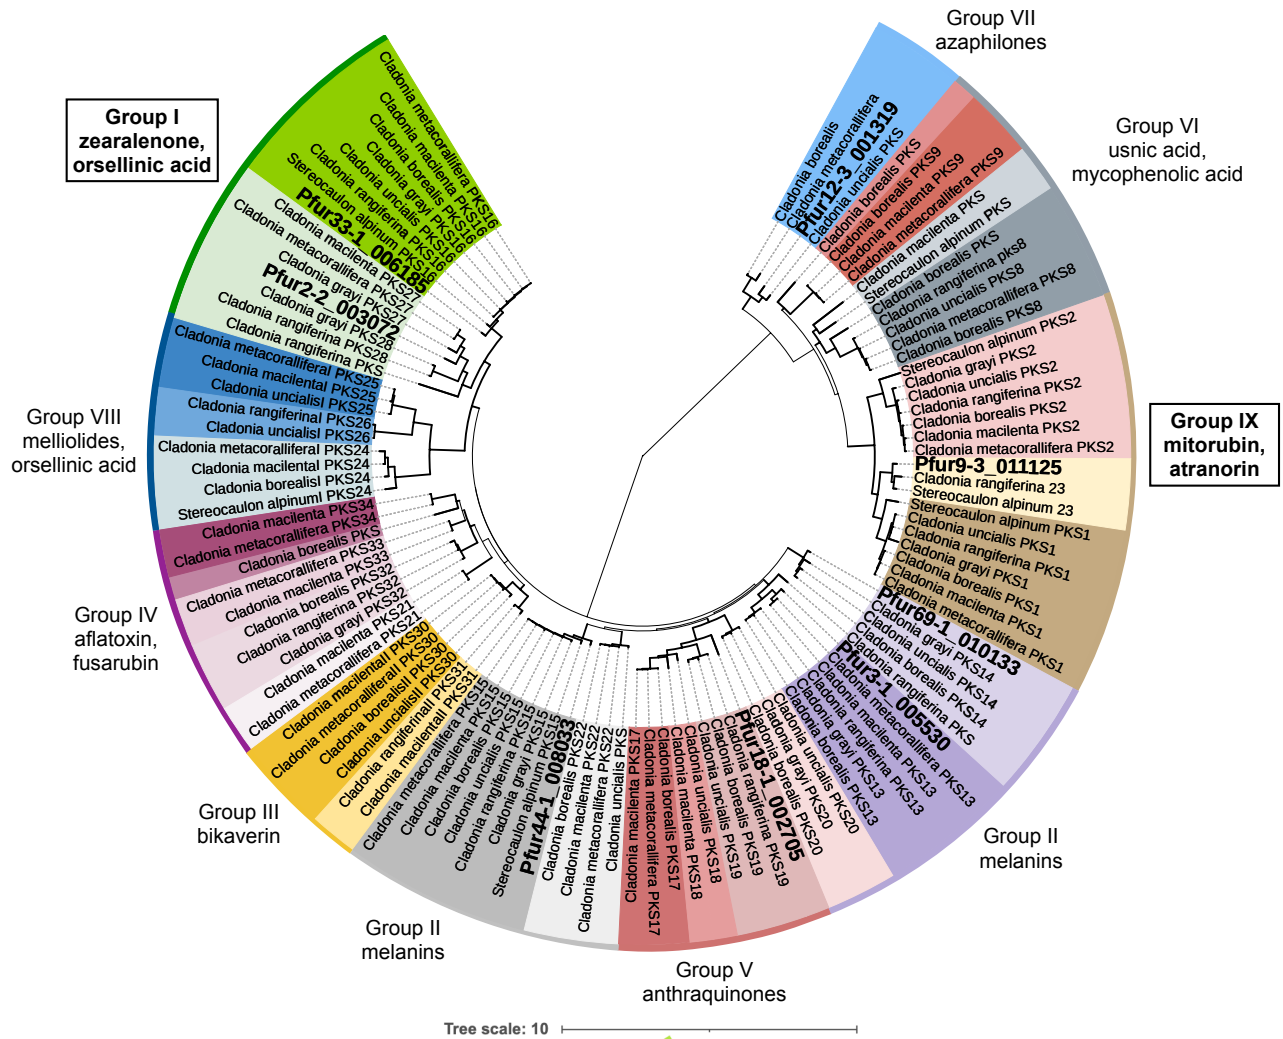

300

301 **Figure 2.** A maximum likelihood tree of 107 NR-PKSs amino acid sequences from six  
 302 *Cladonia* spp., *Stereocaulon alpinum* and eight *P. furfuracea*. Branches is bold indicate the  
 303 bootstrap support of >70%. Different colors indicate different PKSs. PKS families are based  
 304 on Kim et al. (2021). PKSs of *P. furfuracea* are indicated in bold and with larger fonts.

305

### 306 Selection of the candidate cluster for physodic acid and olivetoric acid

307 We complemented the phylogenetic evidence with the other characteristics of the cluster to  
 308 select the possible olivetoric/physodic acid cluster. We found eight clusters containing a *NR-*  
 309 *PKS* that were present in both chemotypes (Supplementary Table 2, Table 3). Of these, only  
 310 one cluster, cluster 4 (Table 3), contained a *NR-PKS* with two ACP domains and a *CytP450* in  
 311 the cluster. The domains of this PKS are – SAT-KS-AT-ACP-ACP-TE (Fig. 3). The most  
 312 similar *PKS* to this is the *PKS* linked to grayanic acid biosynthesis, PKS16. We therefore  
 313 propose cluster 4 to be the most likely candidate for olivetoric-/physodic acid biosynthesis in  
 314 *P. furfuracea*. The cluster has an almost identical structure in both chemotypes, with 10 genes

315 including a *NR-PKS*, a *CytP450* and a monooxygenase (Fig. 3). The protein products of the  
 316 remaining seven genes are unidentified.

317

**Table 3.** NR-PKS clusters detected in both chemotypes of *P. furfuracea*, the PKS domains and other genes present in the cluster

| cluster number | PKS                    | compound defining the group (Kim et al 2021) | PKS category (Kim et al 2021) | PKS domains                 | total genes in the cluster | identified genes in cluster                                                                                                                                                           | Most similar known PKS (MIBiG)                       | coverage & similarity to MIBiG cluster |
|----------------|------------------------|----------------------------------------------|-------------------------------|-----------------------------|----------------------------|---------------------------------------------------------------------------------------------------------------------------------------------------------------------------------------|------------------------------------------------------|----------------------------------------|
| 1              | Pfur12-3_001319        | VII (azaphilones, monascorubrin)             | not known                     | SAT-KS-AT-ACP cMT-TD        | 12                         | Regulatory gene, NRPKS                                                                                                                                                                | monascorubrin                                        | 95%, 58%                               |
| 2              | Pfur18-1_002705        | V (anthraquinones)                           | PKS20                         | SAT-KS-AT-PT-ACP            | 16                         | metallo-beta-lactamase family protein, NRPKS, halogenase                                                                                                                              | RES-1214-2                                           | 61%, 100%                              |
| 3              | Pfur44-1_008033        | II (melanins)                                | PKS15                         | SAT-KS-AT-PT-ACP ACP-TE     | 11                         | PKS, dehydrogenase/reductase (KR)                                                                                                                                                     | naphthalene                                          | 99.5%, 53%                             |
| 4              | <b>Pfur33-1_006185</b> | <b>I (zearalenone, orsellinic acid)</b>      | <b>PKS16</b>                  | <b>SAT-KS-AT-ACP ACP-TE</b> | <b>10</b>                  | <b>cyt P450, PKS, monooxygenase</b>                                                                                                                                                   | <b>grayanic acid</b>                                 | <b>99%, 73%</b>                        |
| 5              | Pfur2-2_003072         | I (zearalenone, orsellinic acid)             | PKS27                         | SAT-KS-AT-PT-ACP-TE         | 13                         | Omethyltransferase, cyt P450, crotonyl-CoA reductase / alcohol dehydrogenase, red-PKS, NRPKS, GATase 7                                                                                | grayanic acid                                        | 100%, 38%                              |
| 6              | Pfur9-3_011125         | IX (mitorubin, atranorin)                    | PKS23                         | SAT-KS-AT-PT-ACP cMT        | 11                         | alkyl hydroperoxide reductase/ Thiol specific, PKS, cyt P450, drug resistance transporter                                                                                             | ascochlorin cluster ( <i>Acremonium egyptiacum</i> ) | 100%, 38%                              |
| 7              | Pfur3-1_005530         | II (melanins)                                | PKS13                         | SAT-KS-AT-PT-ACP-ACP-TE     | 13                         | serine/threonine protein kinase, Drug resistance transporter, monooxygenase FAD-binding, NRPKS, short-chain dehydrogenase/reductase SDR, O-methyltransferase, transcription regulator |                                                      | 100%, 48%                              |
| 8              | Pfur69-1_010133        | II (melanins)                                | PKS14                         | SAT-KS-AT-PT-ACP-ACP-TE     | 9                          | Drug resistance transporter, O-methyltransferase, halogenase, monooxygenase FAD-binding, adh_short (DH-KR), NRPKS, monooxygenase FAD-binding                                          | 6-hydroxymellein ( <i>Cladonia uncialis</i> )        | 99%, 78%                               |

318

319 **Table 3.** Properties of the *NR-PKS* clusters detected in both the chemotypes of *P. furfuracea*.

320 NR-PKS= non-reducing PKS. The cluster in bold, in the box (cluster 4 containing *Pfur33-*

321 *I\_006185*), is the likely cluster for depside/depsidone synthesis. The domain acronyms stand

322 for: KS = keto-synthase, AT=acyltransferase, ACP=acyl carrier protein and KR=

323 ketoreductase. The PKS category is based on the phylogenetic placements of the *P. furfuracea*

324 NR-PKSs in the PKS groups from (Kim *et al.*, 2021). Cluster number refers to Supplementary

325 table S2 and the PKS number to the antiSMASH cluster, followed by the gene number.

326



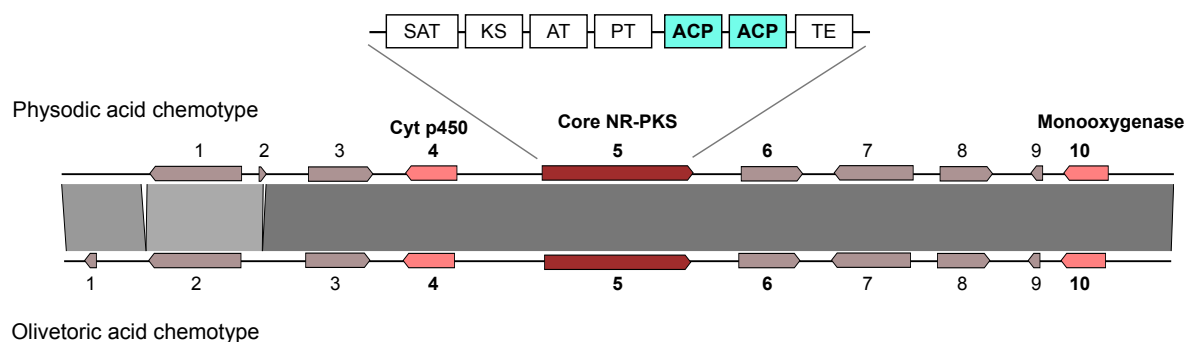

327

328 **Figure 3.** Synteny plot based on tBLASTn depicting conservation and synteny between the  
329 homologous putative cluster for the depsidone, physodic acid and the depside, olivetoric acid  
330 synthesis in *P. furfuracea*. Bolded numbers represent the *P. furfuracea* PKSs.

331

332 We excluded the other seven NR-PKS clusters as possible candidates for  
333 olivetoric/physodic acid synthesis based on the following reasons: Cluster 1 has a cMT  
334 domain in the PKS, lacks *CytP450* and it *PKS* groups with group VII PKSs associated with  
335 the synthesis of azaphilones, monascorubrin related compounds. The *PKS* of cluster 2 lacks a  
336 TE domain, and it groups with *PKSs* linked to anthraquinone biosynthesis (group VII).  
337 *Cytochrome P450* is not present in this cluster. In cluster 3 *CytP450* is absent and the *PKS*  
338 groups with PKSs associated with melanin synthesis (group V). Cluster 5 contains a *R-PKS*  
339 and a *NR-PKS* next to each other divergently transcribed from the same region, suggesting  
340 common regulation and no connection to olivetoric acid synthesis. This cluster does contain a  
341 *CytP450*, but also an *O*-methyltransferase (*OMT*) which is not required for  
342 olivetoric/physodic synthesis. Cluster 6 contains a *CytP450*, but the *PKS* has a cMT domain  
343 and groups phylogenetically with atranorin-synthesizing PKSs (group IX). This is the most  
344 likely cluster involved in the synthesis of atranorin (see next paragraph). Clusters 7 and 8 lack  
345 *CytP450*, contain an *OMT*, and the PKSs group with melanin synthesizing PKSs (group II).  
346

### 347 **A putative atranorin cluster is present in *P. furfuracea***

348 Apart from the orcinol-derived olivetoric- and physodic acid, atranorin (a  $\beta$ -orcinol depside)  
349 is a common secondary metabolite produced by both chemotypes of *P. furfuracea*. Recently,  
350 the atranorin cluster from *Cladonia rangiferina* was characterized and heterologously  
351 expressed (Kim *et al.*, 2021). The atranorin PKS, PKS23, belongs to group IX (Fig. 2). The  
352 putative atranorin PKS is expected to have the following domains: SAT-KS-AT-PT-ACP-



353 cMT-TE. In our study, PKS Pfur9-3\_011125 has this domain architecture and groups  
354 phylogenetically with the atranorin cluster of *Cladonia rangiferina*. This cluster is present in  
355 both chemotypes and has a gene composition similar to the atr1 cluster of *C. rangiferina*, i.e.,  
356 it has a *CytP450*, an *OMT* and a transporter gene. We propose that this cluster is most likely  
357 the atranorin cluster of *P. furfuracea*.

358

### 359 **The two genes for a metabolite FAS are present in *P. furfuracea***

360 *Aspergillus nidulans* has a metabolite FAS with properties similar to those expected for the  
361 unexplored lichen metabolite FASs. The *A. nidulans* FAS comprises two subunits, HexA and  
362 HexB, which produce and deliver to the aflatoxin NR-PKS the hexanoyl starter for  
363 norsolorinic acid, the first metabolite in the pathway (Brown *et al.*, 1996; Watanabe and  
364 Townsend, 2002). We used the *Cladonia grayi* homologs of *HexA* and *HexB* (DalGrande *et*  
365 *al.*, in preparation) to search for the corresponding genes in *P. furfuracea*. We found one  
366 5619-bp HexA homolog and one 6285-bp HexB homolog. Like in *A. nidulans* and *C. grayi*,  
367 in both chemotypes of *P. furfuracea* these genes are adjacent and divergently transcribed from  
368 the same control region (genes FUN\_005930 and FUN\_005931 in the olivetoric acid  
369 chemotype; genes FUN\_004275 and FUN\_004276 in the physodic acid chemotype). These  
370 FAS subunit genes are not linked to the olivetoric/physodic cluster.

371

### 372 **Transcription of the olivetoric/physodic BGC and of *HexA* and *HexB***

373 We checked the transcription of the genes of interest (genes of cluster 4 and *HexA*  
374 and *HexB*) in lichen thalli of both chemotypes. In general, average transcription across the  
375 genome was lower in the olivetoric than in the physodic chemotype. This was reflected in the  
376 clusters as well. Transcriptome data suggest that in cluster 4, three genes out of 10, namely  
377 the *Pfur33-1\_006185*, the *CytP450* and *gene6* (coding for an unknown protein) were  
378 transcriptionally active. We inferred the relative transcription activity by comparing the  
379 number of transcriptome raw reads (normalized by counts per million) that aligned to the  
380 respective gene (Table 4). Relative to the physodic acid (depsidone) chemotype, in the  
381 olivetoric acid (depside) chemotype all genes of cluster4 showed low transcription activity,  
382 although as compared to the other genes in the cluster the same three genes, *NR-PKS*,  
383 *CytP450* and *gene6* showed higher transcription activity. *HexA* and *HexB* were transcribed in  
384 both chemotypes. The number of read counts however, was higher in the physodic acid  
385 chemotype than in the olivetoric acid chemotype. This parallels the behavior of the cluster 4  
386 genes (Table 4).

387

**Table 4.** Read count of the genes of cluster 4 and *P. furfuracea* homologs of HexA and HexB of the olivetoric- and physodic acid chemotype.

| Gene                   | gene identity       | gene length | physodic aid chemotype |                           | olivetoric acid chemotype |                           |
|------------------------|---------------------|-------------|------------------------|---------------------------|---------------------------|---------------------------|
|                        |                     |             | # raw reads aligned    | reads (normalized by CPM) | # raw reads aligned       | reads (normalized by CPM) |
| cluster 4 gene1        | unidentified        | 3822        | 38                     | 0                         | no hits                   | -                         |
| cluster 4 gene2        | unidentified        | 306         | no hits                | -                         | 1                         | 0                         |
| cluster 4 gene3        | unidentified        | 2685        | no hits                | -                         | 19                        | 0                         |
| <b>cluster 4 gene4</b> | <b>cyt p450</b>     | <b>2139</b> | <b>8677</b>            | <b>117.29</b>             | <b>1222</b>               | <b>17.4</b>               |
| <b>cluster 4 gene5</b> | <b>NR-PKS</b>       | <b>6294</b> | <b>111226</b>          | <b>511</b>                | <b>1265</b>               | <b>6.33</b>               |
| <b>cluster 4 gene6</b> | <b>unidentified</b> | <b>2550</b> | <b>13690</b>           | <b>155.25</b>             | <b>6304</b>               | <b>75.38</b>              |
| cluster 4 gene7        | unidentified        | 3284        | 1035                   | 9.11                      | 118                       | 1.125                     |
| cluster 4 gene8        | unidentified        | 2191        | 936                    | 12.35                     | 205                       | 1.98                      |
| cluster 4 gene9        | unidentified        | 492         | no hits                | -                         | 12                        | 0.73                      |
| cluster 4 gene10       | monooxygenase       | 1851        | 46                     | 0.71                      | 19                        | 0.307                     |
| FAS                    | FAS-A               | 5619        | 3143                   | <b>16.17</b>              | 944                       | <b>5.12</b>               |
| FAS                    | FAS-B               | 6285        | 1971                   | <b>9.06</b>               | 911                       | <b>4.42</b>               |

388

389 **Table 4.** Read count of the genes of cluster 4 and *P. furfuracea* homologs of *HexA* and *HexB*  
390 of the olivetoric- and physodic acid chemotype. Transcriptome raw reads and normalized read  
391 counts (by number of reads and gene length (RPKM approach)) aligned to the ten genes of the  
392 candidate physodic and olivetoric acid cluster. Genes in bold (gene 4, 5, and 6) are the ones  
393 with highest number of read counts.

394

### 395 Discussion

396 In this study we describe the putative BGCs for olivetoric- and physodic acid synthesis in the  
397 lichen-forming fungus *P. furfuracea* from high quality long-read genome assemblies of the  
398 two chemotypes. Furthermore, we identify the *HexA* and *HexB* homologs in *P. furfuracea*,  
399 likely to deliver the starters to the orcinol compound PKSs. Combining our findings with  
400 those of Kealey et al. (2021) and of other literature data, we propose an outline for the origin  
401 of the starter unit, chemotype variation, and synthesis of orcinol depsides and depsidones in  
402 lichens.

403

#### 404 **True intraspecific variation underlies differences in BGCs between chemotypes**

405 While most (51) BGCs were present in both chemotypes, six BGCs were present only in one  
406 chemotype (Supplementary info S2). In principle, the differences might be attributed to i)  
407 random variation in sequencing depth, ii) contamination by another fungus, and iii) true  
408 intraspecific variation. Random sequencing depth variation can be excluded, because we  
409 detected no reads of the missing BGC in the raw data. It is very unlikely that large genomic  
410 regions, such as entire BGCs, would be missed due to uneven coverage. Contamination from  
411 reads of minority fungal genomes (e.g. from lichenicolous fungi) can also be excluded, as we  
412 did not detect any coverage variation with underrepresented sequences compared to those  
413 from the main mycobiont. Furthermore, the clusters detected only in the physodic acid  
414 chemotype were also absent in the previously sequenced genome of *Pseudevernia furfuracea*,  
415 which was from the olivetoric acid chemotype (Meiser *et al.*, 2017). True intraspecific  
416 variation is therefore the most likely cause of the observed differences in BGC content  
417 between chemotypes.

418           Intraspecies variations in BGCs have been reported for plants, bacteria, and fungi,  
419 and have been linked to ecological adaptation (Moore *et al.*, 2014; Zhu *et al.*, 2016; Thynne *et al.*,  
420 *et al.*, 2019; Drott *et al.*, 2020). For instance, the number of BGCs may vary between  
421 populations inhabiting different climatic conditions (Drott *et al.*, 2020; Singh *et al.*, 2021). In  
422 fact, fungal BGCs are suggested to be hotspots of gene gain/loss and duplication (Wisecaver  
423 *et al.*, 2014; Lind *et al.*, 2017; Rokas *et al.*, 2018). Different strains of a single species can  
424 contain up to 15 strain-specific clusters (Vicente *et al.*, 2018). The presence of unique BGCs  
425 suggests that each chemotype has a specialized metabolite potential based on genetic  
426 differences. Genome sequences of only two individuals are not likely to capture the  
427 pangenomic variation of BGCs within *P. furfuracea*. BGC variation among individuals of a  
428 species appears to be a common phenomenon and therefore a single individual may not  
429 represent the entire biosynthetic potential of a species (Susca *et al.*, 2016; Villani *et al.*, 2019;  
430 Singh *et al.*, 2021). However, intraspecific biosynthetic variation can also arise when the  
431 BGCs involved are present in all individuals, as exemplified by the BGC likely responsible  
432 for the synthesis of olivetoric acid and physodic acid (see below).

433           Our results suggest that differences in presence/absence of BGCs are not linked to  
434 differences between chemotypes. Although there are many cluster differences between  
435 chemotypes, these differences do not affect the chemistry of the two chemotypes. Instead, the  
436 chemotypic differences appear to be because of the divergent regulation of the same cluster  
437 present in both chemotypes.

438

439 **The same candidate BGC is linked to depside and depsidone biosynthesis**

440 The cluster we identified as the likely BGC linked to olivetoric/physodic biosynthesis has  
441 identical gene content in both chemotypes (Fig. 3), prompting the question of how one  
442 chemotype produces largely the depside olivetoric acid and the other largely the depsidone  
443 physodic acid. The likely BGC includes a *NR-PKS* and a *CytP450*, the two essential  
444 requirements for depside and depsidone synthesis (Armaleo et al. 2011; Kealey et al. 2021).  
445 These are also two of the three most highly transcribed genes in the cluster (Table 4). The  
446 function of the other genes, which are unidentified and mostly transcriptionally silent, with  
447 regard to olivetoric/physodic acid synthesis is unknown (Table 4). Theoretically, differential  
448 transcription of *CytP450* could explain the difference between chemotypes: while the *PKS*  
449 should be expressed in both chemotypes, repression of the *CytP450* gene in the olivetoric  
450 chemotype would prevent the depside to depsidone transition, whereas expression of the  
451 *CytP450* in the physodic chemotype would allow depsidone synthesis. However, the  
452 transcriptome data (Table 4) shows that *CytP450* is transcribed in both chemotypes, probably  
453 because averaging reads from thalli comprising different developmental and physiological  
454 stages cannot reflect subtle developmental transitions occurring at different times and  
455 locations. In fact each chemotype may occasionally produce both, the depside and the  
456 depsidone, depending upon the regulatory and other factors, but one of the two compounds  
457 remains below the level of detection. There are reports of occasional thalli of *P. furfuracea*  
458 containing both, physodic acid and olivetoric acid (Culberson *et al.*, 1977).

459           While at a cellular scale differential transcription is decisive in determining  
460 phenotypes in fungi, secondary metabolite synthesis is a complex, multi-step process  
461 involving various genetic, epigenetic and environmental factors that together determine the  
462 spatio-temporal secondary metabolite profile of an organism (Fox and Howlett, 2008;  
463 Macheleidt *et al.*, 2016; Keller, 2019). Often, the same BGC can be differentially regulated at  
464 the intraspecies level epigenetically, posttranscriptionally or posttranslationally, to produce  
465 different compounds (Yin and Keller, 2011; Patra *et al.*, 2013; Collemare and Seidl, 2019;  
466 Drott *et al.*, 2020). For instance, the aspyridone cluster in *Aspergillus nidulans* can produce up  
467 to eight different compounds depending on the combination of genes activated (Wasil *et al.*,  
468 2013). Although our findings cannot explain which aspects of this complexity differentiate the  
469 chemotypes of *P. furfuracea*, they clearly indicate that differential regulation of the same  
470 BGC is involved. Our study shows that biosynthetic capabilities of organisms may vary

471 within a species and highlights the importance of exploring the biosynthetic potential of  
472 organisms at the intraspecies level.

473

474 **A metabolite fatty acyl synthase is the likely provider of the hexanoyl starter for**  
475 **olivetoric acid synthesis**

476 We found the homologs of *HexA* and *HexB* in *P. furfuracea*. As in *Aspergillus nidulans* and  
477 *Cladonia grayi* these genes are located next to each other and in divergent orientation,  
478 suggesting that they are co-regulated by the same promoter. HexA and HexB refer  
479 respectively to the  $\alpha$  and  $\beta$  subunits of the hexanoate synthase in *A. nidulans*. The FAS  
480 domains ACP, KR and KS are present in the  $\alpha$ -chain and AT, ER, DH and malonyl-ACP  
481 transferase (MPT) in the  $\beta$ -chain (Jenni *et al.*, 2006). HexA/B provides the hexanoyl starter to  
482 the PKS synthesizing the norsolorinic acid precursor of aflatoxin in *Aspergillus*. We propose  
483 that the HexA/B homolog in *P. furfuracea* delivers hexanoyl starters to initiate both rings of  
484 olivetoric acid, although the A-ring side chain ends up being two-carbons longer than the B-  
485 ring chain (Fig. 4), as described in the next section.

486           The PKS of cluster4 we identified in this study as most likely associated with  
487 olivetoric/physodic acid biosynthesis, is the same as *Pfur33-1\_006185* that was  
488 heterologously expressed in yeast by Kealey *et al.* (2021). Interestingly, expression of this  
489 PKS in the heterologous host yielded lecanoric acid (Kealey *et al.* 2021), a compound never  
490 reported from thalli of *P. furfuracea*. Lecanoric acid and olivetoric acid differ in their starter  
491 side chains: both rings of olivetoric acid are started by an hexanoyl chain (Fig. 4) whereas  
492 both rings in lecanoric acid are started by the two-carbon chain from Acetyl CoA. This  
493 indicates that a PKS specific for olivetoric acid in *P. furfuracea* accepts Acetyl CoA as starter  
494 in yeast while it never does so in the lichen where it only accepts hexanoyl chains. Moreover,  
495 the heterologously expressed PKS continued to prefer acetyl CoA in yeast and produce  
496 lecanoric acid even when hexanoyl CoA was provided (Kealey *et al.* 2021). A likely solution  
497 to these apparent contradictions is that the “default” setting for the olivetoric PKS and perhaps  
498 for other orcinol depside PKSs is to accept free acetyl CoA as starter, but not free acyl CoAs  
499 with longer chains. This default setting is revealed only in the absence of a dedicated  
500 metabolite FAS like the one we identified in the lichen. Yeast has no metabolite FAS genes.  
501 The task of the metabolite FAS is to transfer directly to the PKS, through specific binding of  
502 the two proteins, the hexanoyl chain from the FAS ACP to the PKS ACP, with no free acyl  
503 CoA intermediate. That would explain why in yeast the olivetoric PKS would not use free  
504 hexanoyl CoA. Such an acyl-transfer mechanism is identical to what has been proposed for

505 hexanoyl transfer between the HexA-HexB FAS in *A. nidulans* and the norsolorinic acid PKS  
506 (Watanabe *et al.*, 1996; Watanabe and Townsend, 2002). Our identification in *P. furfuracea*  
507 of an expressed (Table 4) close homolog of the *A. nidulans* HexA-HexB FAS provides strong  
508 support for our proposed scenario. An important corollary of this scenario is that the side  
509 chain specificity in lichen orcinol compounds is not controlled exclusively by PKSs but likely  
510 results from specific protein-protein interactions between each PKS and a dedicated  
511 metabolite FAS which synthesizes and delivers the appropriate acyl-ACP starter directly to  
512 the PKS.

513

### 514 **An updated scheme of orcinol depside and depsidone synthesis**

515 We combine here our results with those of Watanabe and Townsend (2002) Armaleo *et al*  
516 (2011), Feng *et al.* (2019), Lünne *et al.*, (2020), and Kealey *et al.*, (2021), to provide an  
517 updated scheme of orcinol depside and depsidone synthesis, using as example the synthesis of  
518 olivetoric and physodic acid. We limit our description to orcinol lichen compounds as we do  
519 not yet know how many of the same rules apply to  $\beta$ -orcinol depsides and depsidones. Orcinol  
520 and  $\beta$ -orcinol PKSs are separated by a deep evolutionary gulf (Fig. 2) and the biological  
521 differences between these two groups of lichen compounds are not well understood.

522

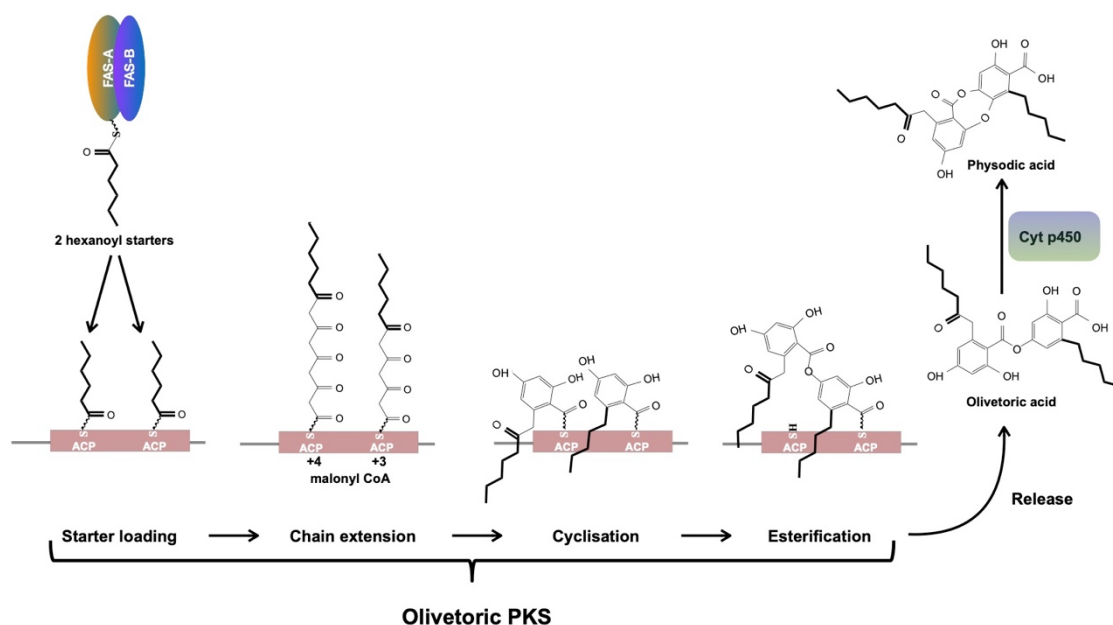

523

524 **Figure 4.** Putative scheme for depside/depsidone synthesis and function of FASs.

525



526           The scheme is depicted in Figure 4. Unless acetyl CoA provides the starter, as is  
527 the case for lecanoric acid and other orcinol compounds with methyl groups as side chains, a  
528 dedicated HexA/B FAS is needed to provide an acyl-ACP as starter to the *PKS*. In the case of  
529 olivetoric acid, hexanoyl-ACP is the starter for both rings and is transferred within the two  
530 proteins bound to each other from the FAS-ACP to the *PKS* ACPs (Fig. 4). The symmetric  
531 addition of starters is not the rule, as many orcinol compounds use different acyl chain starters  
532 for the two rings. Polyketide extension involves a minimum of three malonyl CoA additions,  
533 but can involve four. The *PKS* then cyclizes both polyketide chains to orcinol rings, esterifies  
534 the carboxyl of the A ring with the 4' OH of the B ring and finally releases the depside by  
535 hydrolysis of the B ring thioester. The rings produced after four malonyl additions commonly  
536 have side chains with a  $\beta$ -keto group derived from the carbonyl oxygen of the hexanoyl starter  
537 (Fig. 4), as seen on the A ring side chain of olivetoric and physodic acid. If the released  
538 depside is to be turned into a depsidone, a dedicated cytochrome P450 adds an ether bond,  
539 oxidatively coupling the C2 OH of the A ring to the 5' C of the B ring.

540

## 541 **Conclusions**

542 Our study contributes to the understanding of natural product synthesis in lichenized fungi in  
543 several ways. We identified the BGCs of the two *P. furfuracea* chemotypes and highlighted  
544 the putative cluster linked to physodic- and olivetoric acid biosynthesis. Additionally, we  
545 characterized the *P. furfuracea* homologs of *HexA/HexB*, the first FASs from lichen-forming  
546 fungi putatively involved in metabolite synthesis. Taken together, our results show that the  
547 same BGC has the potential to produce different compounds and suggests that intraspecific  
548 variation in the regulation of metabolite synthesis adds to the biosynthetic diversity and  
549 potential of organisms despite similar BGC content. Our study helped clarify some of the  
550 components determining chemotype variability in lichens and, in combination with other data,  
551 has allowed us to devise the most detailed scheme to date for the synthesis of orcinol depsides  
552 and depsidones. However, although the scheme combines the available evidence in a way  
553 consistent with the known molecular biology and biochemistry of these compounds, a number  
554 of details remain hypothetical and need experimental confirmation.

555

556



557 **Acknowledgements**

558 We thank the LOEWE-Centre TBG funded by the Hessen State Ministry of Higher  
559 Education, Research and the Arts (HMWK). We thank Jürgen Otte (Frankfurt) for help in the  
560 lab, and Anjuli Calchera (Frankfurt) for HPLC analysis and technical support. The authors  
561 have no conflict of interest.

562

563 **Supporting information**

564 **Table S1.** Voucher information of the samples used for the study

565

566 **Table S2.** Details of the estimated biosynthetic gene clusters in the two chemotypes of *P.*  
567 *furfuracea*. PKS number (column 2) refers to the most closely related PKS in the maximum  
568 likelihood tree presented in Figure 2. Region (column 3) refers to the cluster number and  
569 regions in the antiSMASH output.

570

571 **References**

572

573 Armaleo, D., Sun, X., and Culberson, C. (2011) Insights from the first putative biosynthetic  
574 gene cluster for a lichen depside and depsidone. *Mycologia* **103**: 741–754.

575 Benatti, M.N., Gernert, M., and Schmitt, I. (2013) *Parmotrema hydrium*, a new species of  
576 Parmeliaceae in southeastern Brazil. *Acta Bot Brasilica* **27**: 810–814.

577 Blin, K., Shaw, S., Steinke, K., Villebro, R., Ziemert, N., Lee, S.Y., et al. (2019) antiSMASH  
578 5.0: updates to the secondary metabolite genome mining pipeline. *Nucleic Acids Res* **47**:  
579 W81–W87.

580 Boetzer, M. and Pirovano, W. (2014) SSPACE-LongRead: Scaffolding bacterial draft  
581 genomes using long read sequence information. *BMC Bioinformatics* **15**: 211.

582 Brown, D.W., Adams, T.H., and Keller, N.P. (1996) *Aspergillus* has distinct fatty acid  
583 synthases for primary and secondary metabolism. *Proc Natl Acad Sci U S A* **93**: 14873–  
584 14877.

585 Calchera, A., Dal Grande, F., Bode, H.B., and Schmitt, I. (2019) Biosynthetic gene content of  
586 the “perfume lichens” *Evernia prunastri* and *Pseudevernia furfuracea*. *Molecules* **24**:  
587 203.

588 Collemare, J. and Seidl, M.F. (2019) Chromatin-dependent regulation of secondary metabolite  
23

- 589 biosynthesis in fungi: Is the picture complete? *FEMS Microbiol Rev* **43**: 591–607.
- 590 Cox, R.J. and Simpson, T.J. (2009) Fungal type I polyketide synthases. *Methods Enzymol*
- 591 **459**: 49–78.
- 592 Crespo, A., Divakar, P.K., and Hawksworth, D.L. (2011) Generic concepts in parmelioid
- 593 lichens, and the phylogenetic value of characters used in their circumscription. *Lichenol*
- 594 **43**: 511–535.
- 595 Cubero, O.F. and Crespo, A. (2002) Isolation of nucleic acids from lichens. In, Kranner, I.,
- 596 Beckett, R., and Varma, A. (eds), *Protocols in Lichenology*. Berlin: Springer, pp. 381–
- 597 391.
- 598 Culberson, W.L. (1970) Chemosystematics and Ecology of Lichen-Forming Fungi. *Annu Rev*
- 599 *Ecol Syst* **1**: 153–170.
- 600 Culberson, W.L., Culberson, C.F., and Johnson, A. (1977) *Pseudevernia furfuracea*-
- 601 Olivetorina Relationships: Chemistry and Ecology. *Mycologia* **69**: 604.
- 602 Dillies, M.A., Rau, A., Aubert, J., Hennequet-Antier, C., Jeanmougin, M., Servant, N., et al.
- 603 (2013) A comprehensive evaluation of normalization methods for Illumina high-
- 604 throughput RNA sequencing data analysis. *Brief Bioinform* **14**: 671–683.
- 605 Drott, M.T., Bastos, R.W., Rokas, A., Ries, L.N.A., Gabaldón, T., Goldman, G.H., et al.
- 606 (2020) Diversity of secondary metabolism in *Aspergillus nidulans* clinical isolates.
- 607 *mSphere* **5**: e00156-20.
- 608 Feige, G.B., Lumbsch, H.T., Huneck, S., and Elix, J.A. (1993) Identification of lichen
- 609 substances by a standardized high-performance liquid chromatographic method. *J*
- 610 *Chromatogr A* **646**: 417–427.
- 611 Fox, E.M. and Howlett, B.J. (2008) Secondary metabolism: regulation and role in fungal
- 612 biology. *Curr Opin Microbiol* **11**: 481–487.
- 613 Fujii, I., Watanabe, A., Sankawa, U., and Ebizuka, Y. (2001) Identification of Claisen cyclase
- 614 domain in fungal polyketide synthase WA, a naphthopyrone synthase of *Aspergillus*
- 615 *nidulans*. *Chem Biol* **8**: 189–197.
- 616 Goga, M., Elečko, J., Marcinčinová, M., Ručová, D., Bačkorová, M., and Bačkor, M. (2020)
- 617 Lichen metabolites: An overview of some secondary metabolites and their biological
- 618 potential., pp. 175–209.
- 619 Gokhale, R.S., Tsuji, S.Y., Cane, D.E., and Khosla, C. (1999) Dissecting and exploiting
- 620 intermodular communication in polyketide synthases. *Science (80- )* **284**: 482–485.
- 621 Halvorsen, R. and Bendiksen, E. (1982) The chemical variation of *Pseudevernia furfuracea* in
- 622 Norway. *Nord J Bot* **2**: 371–380.

- 623 Hidalgo, M.E., Ferná'ndez, E., Quilhot, W., and Lissi, E. (1994) Antioxidant activity of  
624 depsides and depsidones. *Phytochemistry* **37**: 1585–1587.
- 625 Hitchman, T.S., Schmidt, E.W., Trail, F., Rarick, M.D., Linz, J.E., and Townsend, C.A.  
626 (2001) Hexanoate synthase, a specialized type I fatty acid synthase in aflatoxin B1  
627 biosynthesis. *Bioorg Chem* **29**: 293–307.
- 628 Ingelfinger, R., Henke, M., Roser, L., Ulshöfer, T., Calchera, A., Singh, G., et al. (2020)  
629 Unraveling the pharmacological potential of lichen extracts in the context of cancer and  
630 inflammation with a broad screening approach. *Front Pharmacol* **11**: 1322.
- 631 Jenni, S., Leibundgut, M., Maier, T., and Ban, N. (2006) Architecture of a fungal fatty acid  
632 synthase at 5 Å resolution. *Science (80- )* **311**: 1263–1267.
- 633 Jørgensen, S.H., Frandsen, R.J.N., Nielsen, K.F., Lysøe, E., Sondergaard, T.E., Wimmer, R.,  
634 et al. (2014) *Fusarium graminearum* PKS14 is involved in orsellinic acid and orcinol  
635 synthesis. *Fungal Genet Biol* **70**: 24–31.
- 636 Kautsar, S.A., Blin, K., Shaw, S., Navarro-Muñoz, J.C., Terlouw, B.R., Van Der Hooft, J.J.J.,  
637 et al. (2020) MIBiG 2.0: A repository for biosynthetic gene clusters of known function.  
638 *Nucleic Acids Res* **48**: D454–D458.
- 639 Kealey, J.T., Craig, J.P., and Barr, P.J. (2021) Identification of a lichen depside polyketide  
640 synthase gene by heterologous expression in *Saccharomyces cerevisiae*. *Metab Eng*  
641 *Commun* e00172.
- 642 Keller, N.P. (2019) Fungal secondary metabolism: regulation, function and drug discovery.  
643 *Nat Rev Microbiol* **17**: 167–180.
- 644 Kim, D., Pertea, G., Trapnell, C., Pimentel, H., Kelley, R., and Salzberg, S.L. (2013)  
645 TopHat2: Accurate alignment of transcriptomes in the presence of insertions, deletions  
646 and gene fusions. *Genome Biol* **14**: R36.
- 647 Kjærbo'ling, I., Vesth, T.C., Frisvad, J.C., Nybo, J.L., Theobald, S., Kuo, A., et al. (2018)  
648 Linking secondary metabolites to gene clusters through genome sequencing of six  
649 diverse *Aspergillus* species. *Proc Natl Acad Sci U S A* **115**: E753–E761.
- 650 Kolmogorov, M., Yuan, J., Lin, Y., and Pevzner, P.A. (2019) Assembly of long, error-prone  
651 reads using repeat graphs. *Nat Biotechnol* **37**: 540–546.
- 652 Kosanić, M., Manojlović, N., Janković, S., Stanojković, T., and Ranković, B. (2013) *Evernia*  
653 *prunastri* and *Pseudevernia furfuraceae* lichens and their major metabolites as  
654 antioxidant, antimicrobial and anticancer agents. *Food Chem Toxicol* **53**: 112–118.
- 655 Kroken, S., Glass, N.L., Taylor, J.W., Yoder, O.C., and Turgeon, B.G. (2003) Phylogenomic  
656 analysis of type I polyketide synthase genes in pathogenic and saprobic ascomycetes.

- 657 *Proc Natl Acad Sci U S A* **100**: 15670–15675.
- 658 Lind, A.L., Wisecaver, J.H., Lameiras, C., Wiemann, P., Palmer, J.M., Keller, N.P., et al.  
659 (2017) Drivers of genetic diversity in secondary metabolic gene clusters within a fungal  
660 species. *PLoS Biol* **15**: e2003583.
- 661 Lünne, F., Niehaus, E.M., Lipinski, S., Kunigkeit, J., Kalinina, S.A., and Humpf, H.U. (2020)  
662 Identification of the polyketide synthase PKS7 responsible for the production of  
663 lecanoric acid and ethyl lecanorate in *Claviceps purpurea*. *Fungal Genet Biol* **145**:  
664 103481.
- 665 Macheleidt, J., Mattern, D.J., Fischer, J., Netzker, T., Weber, J., Schroeckh, V., et al. (2016)  
666 Regulation and role of fungal secondary metabolites. *Annu Rev Genet* **50**: 371–392.
- 667 Manojlović, N., Ranković, B., Kosanić, M., Vasiljević, P., and Stanojković, T. (2012)  
668 Chemical composition of three *Parmelia* lichens and antioxidant, antimicrobial and  
669 cytotoxic activities of some their major metabolites. *Phytomedicine* **19**: 1166–1172.
- 670 Martellos, S. (2003) The distribution of the two chemical varieties of the lichen *Pseudevernia*  
671 *furfuracea* in Italy. *Plant Biosyst* **137**: 29–33.
- 672 Martinet, L., Naômé, A., Deflandre, B., Maciejewska, M., Tellatin, D., Tenconi, E., et al.  
673 (2019) A single biosynthetic gene cluster is responsible for the production of bagremycin  
674 antibiotics and ferroverdin iron chelators. *MBio* **10**:.
- 675 ME Hidalgo, E.F.W.Q.E.L. (1994) Antioxidant capacity of depsides and depsidones.  
676 *Phytochemistry* **37**: 1585–1587.
- 677 Medema, M.H., Blin, K., Cimermancic, P., de Jager, V., Zakrzewski, P., Fischbach, M.A., et  
678 al. (2011) antiSMASH: rapid identification, annotation and analysis of secondary  
679 metabolite biosynthesis gene clusters in bacterial and fungal genome sequences. *Nucleic*  
680 *Acids Res* **39**: W339-46.
- 681 Meiser, A., Otte, J., Schmitt, I., and Grande, F.D. (2017) Sequencing genomes from mixed  
682 DNA samples - Evaluating the metagenome skimming approach in lichenized fungi. *Sci*  
683 *Rep* **7**: 1–13.
- 684 Moore, B.D., Andrew, R.L., Külheim, C., and Foley, W.J. (2014) Explaining intraspecific  
685 diversity in plant secondary metabolites in an ecological context. *New Phytol* **201**: 733–  
686 750.
- 687 Mortazavi, A., Williams, B.A., McCue, K., Schaeffer, L., and Wold, B. (2008) Mapping and  
688 quantifying mammalian transcriptomes by RNA-Seq. *Nat Methods* **5**: 621–628.
- 689 Oshlack, A. and Wakefield, M.J. (2009) Transcript length bias in RNA-seq data confounds  
690 systems biology. *Biol Direct* **4**: 14.

- 691 Palmer, J. and Stajich, J. (2019) Funannotate v1.7.4. *Zenodo*.
- 692 Patra, B., Schluttenhofer, C., Wu, Y., Pattanaik, S., and Yuan, L. (2013) Transcriptional  
693 regulation of secondary metabolite biosynthesis in plants. *Biochim Biophys Acta - Gene*  
694 *Regul Mech* **1829**: 1236–1247.
- 695 Pereira, E.C., Da Silva, N.H., Buriel, M. de L.L., Martins, M.C.B., Silva, H.A.M.F., Falcão,  
696 E.P.S., et al. (2020) Bioactive compounds from brazilian lichens and their  
697 biotechnological applications. In, *Plant-derived Bioactives: Production, Properties and*  
698 *Therapeutic Applications*. Springer Singapore, pp. 209–238.
- 699 Pizarro, D., Divakar, P.K., Grewe, F., Crespo, A., Dal Grande, F., and Lumbsch, H.T.  
700 (2020) Genome-wide analysis of biosynthetic gene cluster reveals correlated gene loss  
701 with absence of usnic acid in lichen-forming fungi. *Genome Biol Evol* **12**: 1858–1868.
- 702 Rice, P., Longden, L., and Bleasby, A. (2000) EMBOSS: The European Molecular Biology  
703 Open Software Suite. *Trends Genet* **16**: 276–277.
- 704 Robinson, M.D. and Oshlack, A. (2010) A scaling normalization method for differential  
705 expression analysis of RNA-seq data. *Genome Biol* **11**: R25.
- 706 Rokas, A., Wisecaver, J.H., and Lind, A.L. (2018) The birth, evolution and death of metabolic  
707 gene clusters in fungi. *Nat Rev Microbiol* **16**: 731–744.
- 708 Rundel, P.W. (1978) The ecological role of secondary lichen substances. *Biochem Syst Ecol*  
709 **6**: 157–170.
- 710 Sanchez, J.F., Chiang, Y.M., Szewczyk, E., Davidson, A.D., Ahuja, M., Elizabeth Oakley, C.,  
711 et al. (2010) Molecular genetic analysis of the orsellinic acid/F9775 gene cluster of  
712 *Aspergillus nidulans*. *Mol Biosyst* **6**: 587–593.
- 713 Shen, W., Le, S., Li, Y., and Hu, F. (2016) SeqKit: A cross-platform and ultrafast toolkit for  
714 FASTA/Q file manipulation. *PLoS One* **11**: e0163962.
- 715 Shrestha, G. and St. Clair, L.L. (2013) Lichens: A promising source of antibiotic and  
716 anticancer drugs. *Phytochem Rev* **12**: 229–244.
- 717 Shukla, V., Joshi, G.P., and Rawat, M.S.M. (2010) Lichens as a potential natural source of  
718 bioactive compounds: A review. *Phytochem Rev* **9**: 303–314.
- 719 Simão, F.A., Waterhouse, R.M., Ioannidis, P., Kriventseva, E. V., and Zdobnov, E.M. (2015)  
720 BUSCO: assessing genome assembly and annotation completeness with single-copy  
721 orthologs. *Bioinformatics* **31**: 3210–3212.
- 722 Singh, G., Calchera, A., Schulz, M., Drechsler, M., Bode, H.B., Schmitt, I., and Dal Grande,  
723 F. (2021) Climate-specific biosynthetic gene clusters in populations of a lichen-forming  
724 fungus. *Environ Microbiol* **23**: 4260–4275.

- 725 Smith, S. and Tsai, S.C. (2007) The type I fatty acid and polyketide synthases: A tale of two  
726 megasynthases. *Nat Prod Rep* **24**: 1041–1072.
- 727 Stadler, M. and Hellwig, V. (2005) Chemotaxonomy of the Xylariaceae and remarkable  
728 bioactive compounds from Xylariales and their associated asexual stages. *Recent Res*  
729 *Dev Phytochem* **9**: 1–53.
- 730 Stanojković, T. (2015) Investigations of lichen secondary metabolites with potential  
731 anticancer activity. In, *Lichen Secondary Metabolites: Bioactive Properties and*  
732 *Pharmaceutical Potential*. Springer International Publishing, pp. 127–146.
- 733 Sullivan, M.J., Petty, N.K., and Beatson, S.A. (2011) Easyfig: A genome comparison  
734 visualizer. *Bioinformatics* **27**: 1009–1010.
- 735 Thynne, E., Mead, O.L., Chooi, Y.-H., McDonald, M.C., and Solomon, P.S.  
736 (2019) Acquisition and loss of secondary metabolites shaped the evolutionary path of  
737 three emerging phytopathogens of wheat. *Genome Biol Evol* **11**: 890–905.
- 738 Valarmathi, R., Hariharan, G.N., Venkataraman, G., and Parida, A. (2009) Characterization of  
739 a non-reducing polyketide synthase gene from lichen *Dirinaria applanata*.  
740 *Phytochemistry* **70**: 721–729.
- 741 Vicente, C.M., Thibessard, A., Lorenzi, J.N., Benhadj, M., Hôtel, L., Gacemi-Kirane, D., et  
742 al. (2018) Comparative genomics among closely related streptomyces strains revealed  
743 specialized metabolite biosynthetic gene cluster diversity. *Antibiotics* **7**: 86.
- 744 Walker, B.J., Abeel, T., Shea, T., Priest, M., Abouelliel, A., Sakthikumar, S., et al.  
745 (2014) Pilon: An integrated tool for comprehensive microbial variant detection and  
746 genome assembly improvement. *PLoS One* **9**: e112963.
- 747 Wasil, Z., Pahirulzaman, K.A.K., Butts, C., Simpson, T.J., Lazarus, C.M., and Cox, R.J.  
748 (2013) One pathway, many compounds: Heterologous expression of a fungal  
749 biosynthetic pathway reveals its intrinsic potential for diversity. *Chem Sci* **4**: 3845–3856.
- 750 Watanabe, C.M.H. and Townsend, C.A. (2002) Initial characterization of a type I fatty acid  
751 synthase and polyketide synthase multienzyme complex NorS in the biosynthesis of  
752 aflatoxin B1. *Chem Biol* **9**: 981–988.
- 753 Watanabe, C.M.H., Wilson, D., Linz, J.E., and Townsend, C.A. (1996) Demonstration of the  
754 catalytic roles and evidence for the physical association of type I fatty acid synthases and  
755 a polyketide synthase in the biosynthesis of aflatoxin B1. *Chem Biol* **3**: 463–469.
- 756 Wisecaver, J.H., Slot, J.C., and Rokas, A. (2014) The Evolution of Fungal Metabolic  
757 Pathways. *PLoS Genet* **10**: e1004816.
- 758 Yin, W. and Keller, N.P. (2011) Transcriptional regulatory elements in fungal secondary

759 metabolism. *J Microbiol* **49**: 329–339.

760 Zhu, B., Ibrahim, M., Cui, Z., Xie, G., Jin, G., Kube, M., et al. (2016) Multi-omics analysis of  
761 niche specificity provides new insights into ecological adaptation in bacteria. *ISME J* **10**:  
762 2072–2075.
